# Supplementary material
Source: publisher figshare collection journal article supplement (https://acs.figshare.com/ndownloader/files/4386628)
Supplement: Supplementary file 1 [file 4386628]

## Supporting Information

### Resist Free Patterning of Nonpreferential Buffer Layers for Block Copolymer Lithography

Eungnak Han, Melvina Leolukman, Myungwoong Kim, and Padma Gopalan\*

Department of Materials Science and Engineering, University of Wisconsin-Madison, Madison, WI 53706

#### (a) PS-*b*-PMMA-OH ( $F_{st}=0.18$ )

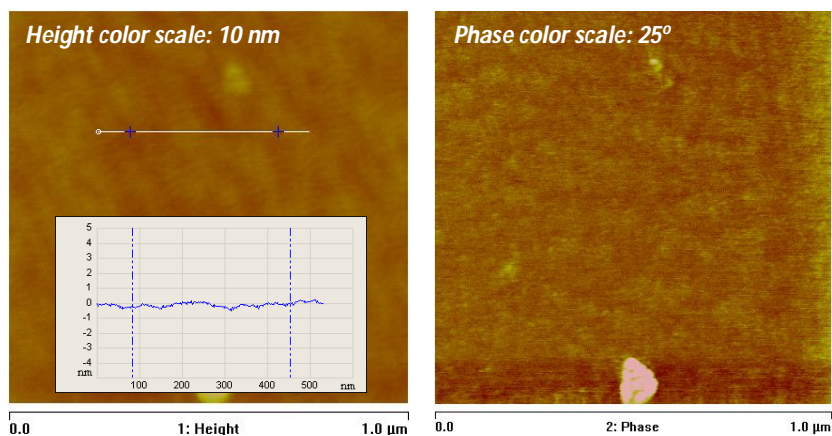

#### (b) PS-*b*-PMMA-OH ( $F_{st}=0.25$ )

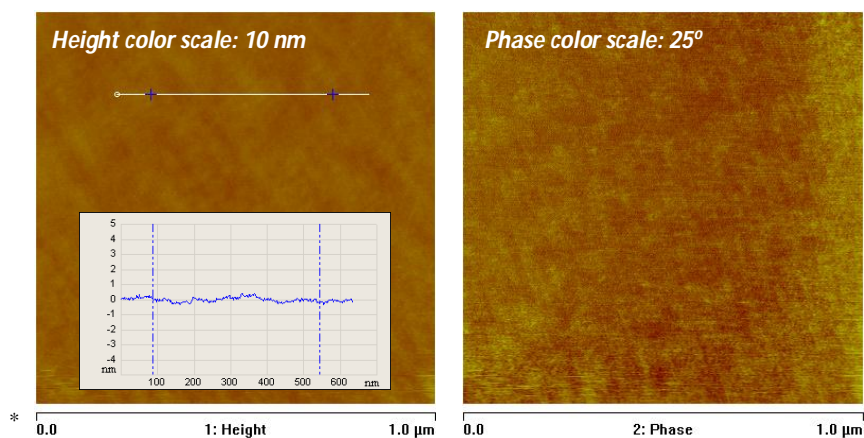

Figure S1. AFM analysis of grafted block copolymers showing smooth surfaces after thermal annealing at 190 °C for 12h.

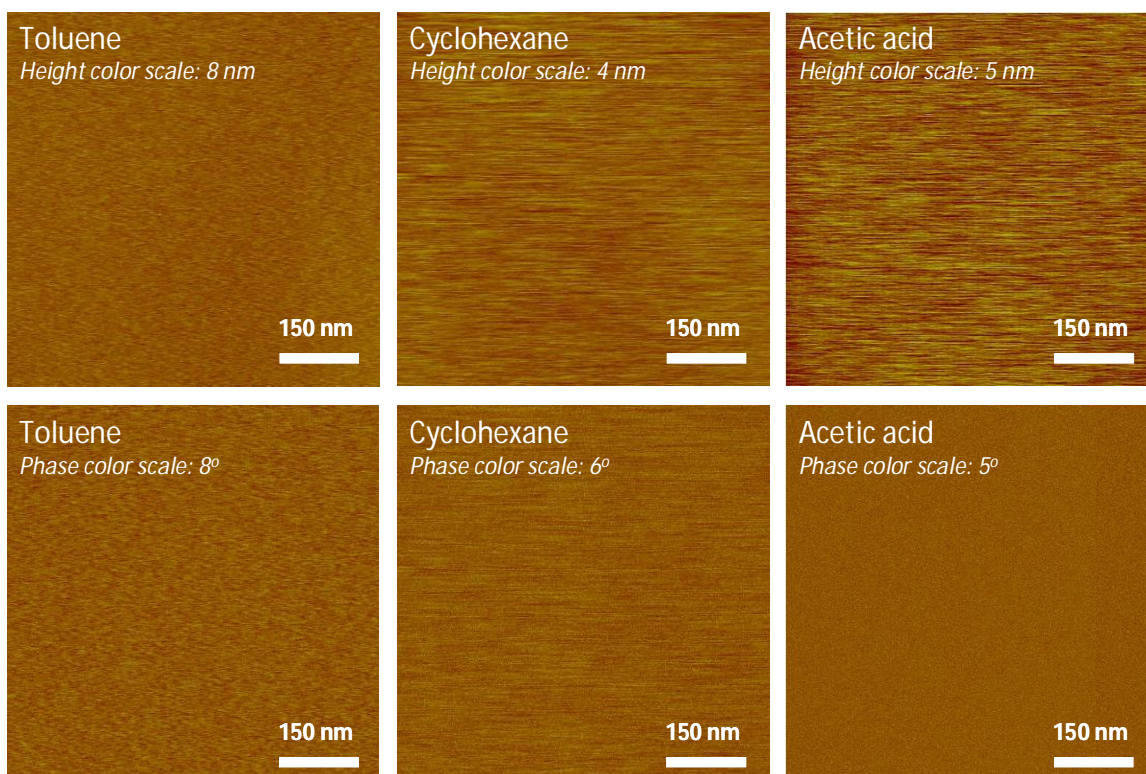

Figure S2. AFM analysis of grafted block copolymer ( $F_{St}=0.25$ ) showing smooth surfaces after various solvent treatment for 30 min.
